# Supplementary material
Source: PubMed Central journal article supplement (PMC11029719)
Supplement: 262_2014_1596_MOESM1_ESM.pdf [file 262_2014_1596_MOESM1_ESM.pdf]

**Supplementary Table 1: Tested antigens and the respective antibody clone.**

| <b>Antigen</b> | <b>Antibody clone</b> | <b>Fluorochrome</b>             |
|----------------|-----------------------|---------------------------------|
| CD3            | UCHT1                 | Pacific Blue                    |
| CD4            | SK3                   | APC-Cy7                         |
| CD11b          | ICRF44                | PE-Cy7                          |
| CD14           | MΦP9                  | APC-Cy7                         |
| CD15           | HI98                  | FITC                            |
| CD16           | 3G8                   | PerCP-Cy5.5                     |
| CD19           | HIB19                 | FITC                            |
| CD25           | M-A251                | APC-Cy7 and APC                 |
| CD33           | WM-53                 | APC                             |
| CD45RA         | HI100 or 5H9          | APC-H7 and APC                  |
| CD56           | B-159 or HCD56        | PE-Cy7 and Brilliant Violet 421 |
| CD62L          | SK11                  | PE                              |
| CD69           | L78                   | APC                             |
| CD103          | Ber-ACT8              | FITC                            |
| CD124          | hIL-4R M57            | PE                              |
| CD127          | hIL-7R-M21            | PerCP-Cy5.5                     |
| CD195          | 3A9                   | APC                             |
| CD197          | 3D12                  | PE-Cy7                          |
| FoxP3          | 259D7C7               | PE                              |
| HLA-DR         | G46-6                 | PerCP-Cy5.5                     |
| Vδ2            | B6                    | FITC                            |
| Vγ9            | B3                    | PE                              |

**Supplementary Table 2: Antigen staining panels for immunophenotyping.**

|                                                    | Fluorochrome-labeled antibodies ( $\alpha$ -) |              |             |        |       |                   |                                      | Aqua      |
|----------------------------------------------------|-----------------------------------------------|--------------|-------------|--------|-------|-------------------|--------------------------------------|-----------|
|                                                    | FITC                                          | PE           | PerCP-Cy5.5 | PE-Cy7 | APC   | APC-Cy7 or APC-H7 | Pacific Blue or Brilliant Violet 421 |           |
| <b>Panel-1 (B-, T-, NK cells)</b>                  | V $\delta$ 2<br>CD19                          | V $\gamma$ 9 | CD16        | CD56   | CD69  | CD25              | CD3                                  | Live/Dead |
| <b>Panel-2 (Treg)</b>                              | CD103                                         | FoxP3        | CD127       | CD45RA | CD25  | CD4               | CD3                                  | Live/Dead |
| <b>Panel-3 (MDSC)</b>                              | CD15                                          | CD124        | HLA-DR      | CD11b  | CD33  | CD14              | CD19<br>CD56<br>CD3                  | Live/Dead |
| <b>Panel-4 (<math>\gamma\delta</math> T-cells)</b> | V $\delta$ 2<br>CD19                          | CD62L        | CD16        | CD197  | CD195 | CD45RA            | CD3                                  | Live/Dead |

**Supplementary Table 3: Overview of intra- and inter-assay variations for immune cell subpopulations.**

|                                             |    | Intra-assay variability<br>CV [range]                                          | Inter-assay variability<br>CV [range] |                     |
|---------------------------------------------|----|--------------------------------------------------------------------------------|---------------------------------------|---------------------|
| <b>Panel-1</b><br>(T, B, NK cells)          | 1  | CD19 <sup>+</sup> B cells                                                      | 12.19 [5.74-9.58]                     | 24.99 [6.69-13.36]  |
|                                             | 2  | CD3 <sup>+</sup> T cells                                                       | 9.77 [48.06-78.98]                    | 2.37 [61.94-77.71]  |
|                                             | 3  | CD16 <sup>+</sup> CD56 <sup>+</sup> NK cells                                   | 7.44 [4.13-9.56]                      | 3.15 [4.51-9.75]    |
|                                             | 4  | V $\delta$ 2 T cells                                                           | 9.85 [1.33-3.76]                      | 9.15 [1.37-3.84]    |
|                                             | 5  | CD25 <sup>+</sup> T cells                                                      | 12.58 [4.15-8.93]                     | 14.38 [3.10-7.75]   |
|                                             | 6  | CD69 <sup>+</sup> T cells                                                      | 14.31 [0.22-0.65]                     | 24.47 [0.12-0.72]   |
|                                             | 7  | CD69 <sup>+</sup> NK cells                                                     | 15.41 [0.84-2.33]                     | 32.21 [0.85-2.50]   |
|                                             | 8  | CD25 <sup>+</sup> V $\delta$ 2 <sup>+</sup> T cells                            | 29.59 [0.28-2.00]                     | 45.42 [0.10-1.42]   |
|                                             | 9  | CD69 <sup>+</sup> V $\delta$ 2 <sup>+</sup> T cells                            | 40.97 [0.24-1.11]                     | 44.36 [0.18-1.34]   |
|                                             | 10 | CD16 <sup>+</sup> V $\delta$ 2 <sup>+</sup> T cells                            | 1.80 [42.95-57.87]                    | 7.89 [42.03-58.85]  |
| <b>Panel-2</b> (Tregs)                      | 11 | CD4 <sup>+</sup> T cells                                                       | 0.31 [52.90-78.46]                    | 3.71 [51.28-75.84]  |
|                                             | 12 | CD4 <sup>+</sup> Treg                                                          | 1.34 [6.08-9.53]                      | 9.47 [5.69-9.44]    |
|                                             | 13 | CD45RA <sup>+</sup> Treg                                                       | 3.39 [11.60-43.43]                    | 15.55 [11.68-52.38] |
|                                             | 14 | FoxP3 <sup>hi</sup> CD45RA <sup>-</sup> Treg                                   | 8.57 [3.54-11.71]                     | 32.92 [3.93-11.12]  |
|                                             | 15 | FoxP3 <sup>lo</sup> CD45RA <sup>+</sup> Treg                                   | 1.86 [49.77-74.30]                    | 9.75 [36.88-74.11]  |
|                                             | 16 | CD103 <sup>+</sup> Treg                                                        | 11.23 [0.41-4.39]                     | 33.06 [0.30-4.18]   |
| <b>Panel-3</b><br>(MDSC)                    | 17 | MDSC1                                                                          | 5.26 [0.07-0.10]                      | 10.16 [0.08-0.12]   |
|                                             | 18 | MDSC2                                                                          | 6.36 [0.16-1.00]                      | 7.17 [0.17-0.98]    |
|                                             | 19 | MDSC3                                                                          | 15.55 [0.00-1.37]                     | 58.95 [0.00-1.26]   |
|                                             | 20 | MDSC4                                                                          | 2.16 [13.89-23.91]                    | 6.07 [12.30-23.72]  |
|                                             | 21 | MDSC5                                                                          | 3.68 [1.71-4.42]                      | 17.43 [1.47-4.75]   |
|                                             | 22 | MDSC6                                                                          | 5.72 [0.27-0.37]                      | 10.16 [0.27-0.40]   |
| <b>Panel-4</b><br>( $\gamma\delta$ T cells) | 23 | CD45RA <sup>+</sup> CD62L <sup>+</sup><br>of V $\delta$ 2 <sup>+</sup> T cells | 2.31 [15.74-44.68]                    | 18.79 [16.36-43.62] |
|                                             | 24 | CD45RA <sup>-</sup> CD62L <sup>+</sup><br>of V $\delta$ 2 <sup>+</sup> T cells | 1.80 [14.60-41.93]                    | 11.93 [14.80-50.62] |
|                                             | 25 | CD45RA <sup>-</sup> CD62L <sup>-</sup><br>of V $\delta$ 2 <sup>+</sup> T cells | 2.85 [9.21-41.23]                     | 17.09 [9.76-40.90]  |
|                                             | 26 | CD45RA <sup>+</sup> CD62L <sup>-</sup><br>of V $\delta$ 2 <sup>+</sup> T cells | 3.61 [8.98-32.45]                     | 15.05 [6.41-31.96]  |

## Supplementary Figure 1

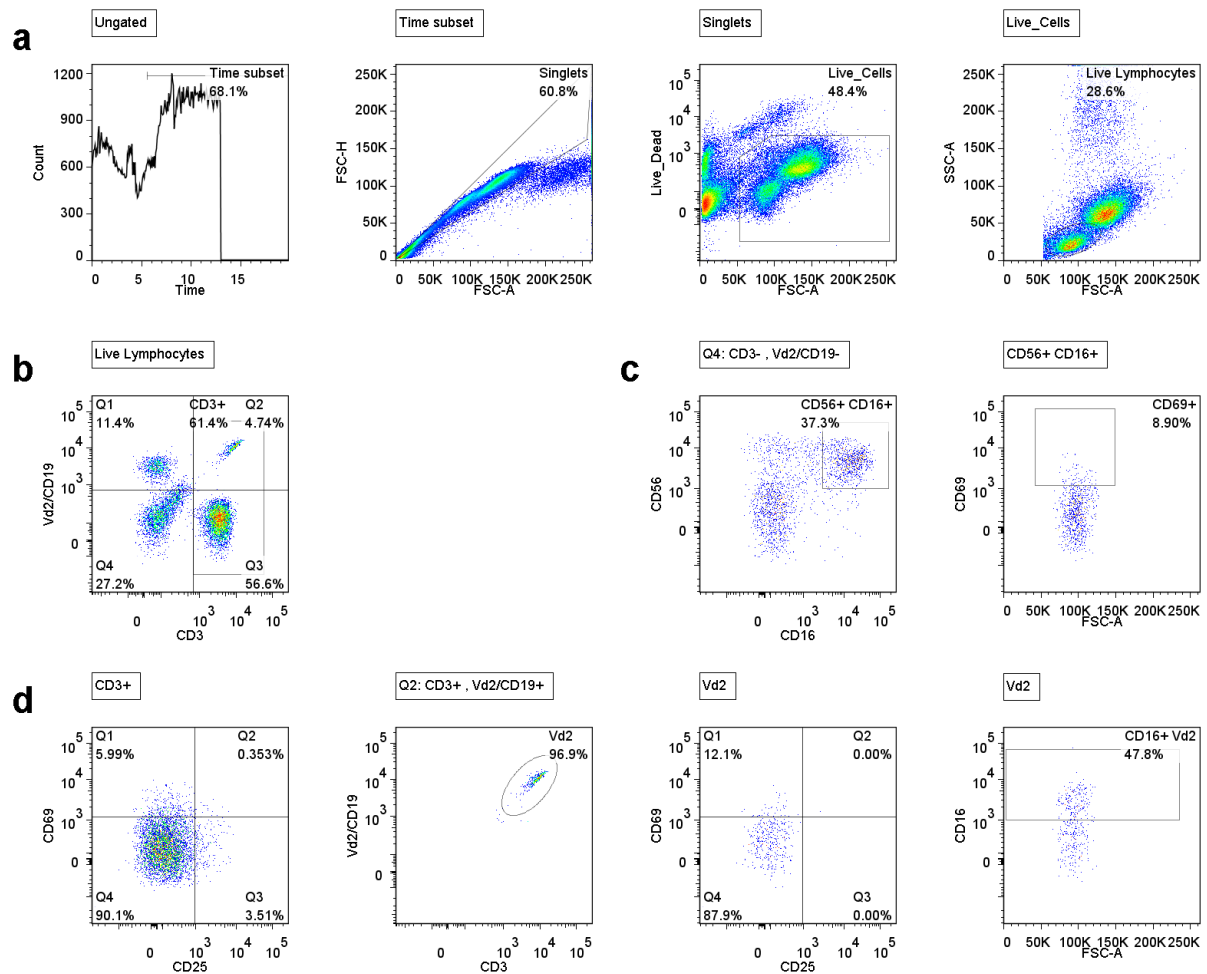

**Supplementary Figure 1: Gating strategy for Panel-1 – the major effector cell panel.** Cells for analysis of Panel-1 were gated as follows: **(a)** setting the time gate, exclusion of doublets, gating on live cells, and furthermore on lymphocytes in FSC/SSC. **(b)** B cells were identified as CD19<sup>+</sup> cells. T cells were identified as CD3<sup>+</sup> cells. **(c)** NK cells were identified as CD56<sup>+</sup>CD16<sup>+</sup> cells gated in CD3<sup>-</sup>CD19<sup>-</sup>Vδ2<sup>-</sup> cells. CD56<sup>+</sup>CD16<sup>+</sup> NK cells were further gated on activation marker CD69. **(d)** CD3<sup>+</sup> T cells were further gated on activation markers CD25 and CD69. Vδ2-antibody was used for identification of Vδ2<sup>+</sup> T cells in combination with CD3. Vδ2<sup>+</sup>CD3<sup>+</sup> T cells were further gated on activation markers CD25 and CD69 (by transferring a gate previously set on CD3<sup>+</sup> cells) as well as on FcγRIII/CD16.

## Supplementary Figure 2

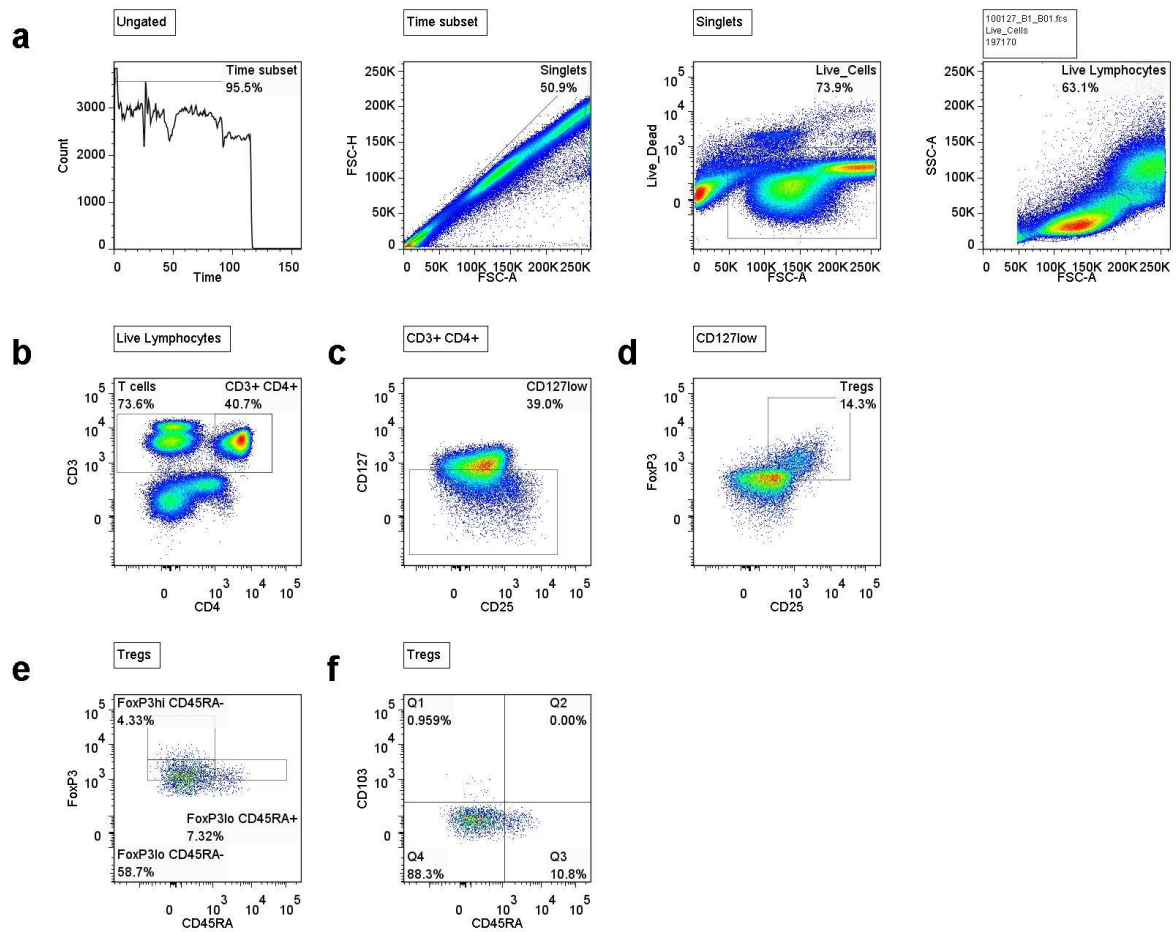

**Supplementary Figure 2: Gating strategy for Panel-2 – the regulatory T cell panel.** (a) Cells for analysis of Panel-2 were gated as follows: setting the time gate, exclusion of doublets, gating on live cells, and furthermore on lymphocytes in FSC/SSC. (b) T cells were identified as CD3<sup>+</sup> cells. CD4<sup>+</sup> T cells were identified as CD3<sup>+</sup>CD4<sup>+</sup> cells. (c) These cells were further gated on CD127<sup>lo</sup> cells. (d) Among CD127<sup>lo</sup>CD4<sup>+</sup> T cells Tregs were identified as CD25<sup>+</sup>Foxp3<sup>+</sup> cells. (e) Furthermore, these cells were gated on activated Treg (FoxP3<sup>hi</sup>CD45RA<sup>-</sup>), resting Treg (FoxP3<sup>lo</sup>CD45RA<sup>+</sup>) and non-suppressive T cells (FoxP3<sup>lo</sup>CD45RA<sup>-</sup>). (f) Additionally the expression of CD103 and CD45RA was analyzed in Tregs.

### Supplementary Figure 3

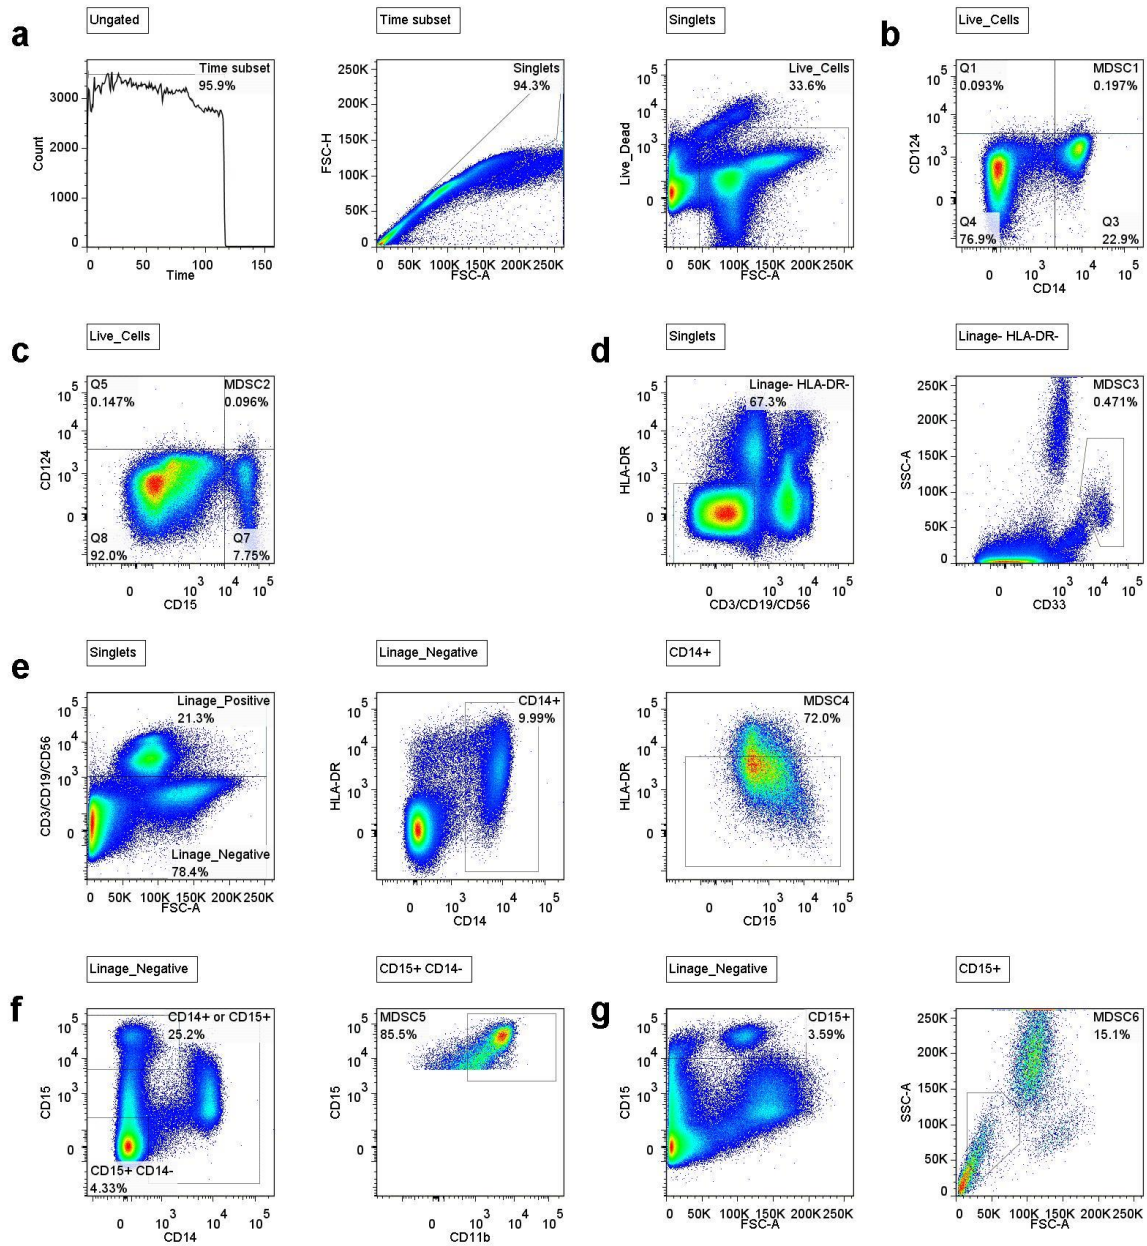

**Supplementary Figure 3: Gating strategy for Panel-3 – the myeloid derived suppressor cell (MDSC) panel.** Cells for analysis of Panel-3 were gated as follows: (a) setting the time gate, exclusion of doublets, and gating on live cells (used for MDSC1 and MDSC2). (b) The MDSC1 population was identified as CD14<sup>+</sup>CD124<sup>+</sup> cells. (c) The MDSC2 population was identified as CD15<sup>+</sup>CD124<sup>+</sup> cells. (d) For identification of MDSC3, singlets were gated on HLA-DR<sup>-</sup> lineage<sup>-</sup> (i.e. CD3<sup>-</sup>CD19<sup>-</sup>CD56<sup>-</sup>) cells. These cells were further gated on CD33<sup>+</sup>SSC<sup>int</sup> cells to identify MDSC3. (e) For identification of the MDSC4 population, lineage<sup>-</sup> singlet cells were gated on CD14<sup>+</sup> cells. These cells were further gated on HLA-DR<sup>lo</sup> cells to identify MDSC4. (f) For identification of MDSC5, lineage<sup>-</sup> cells were gated on CD15<sup>+</sup>CD14<sup>-</sup> cells. These cells were further gated on CD11b<sup>+</sup> cells to identify MDSC5. (g) The MDSC6 population was identified by gating lineage<sup>-</sup> cells on CD15<sup>+</sup> cells which were further gated on FSC<sup>lo</sup>SSC<sup>hi</sup> cells.

## Supplementary Figure 4

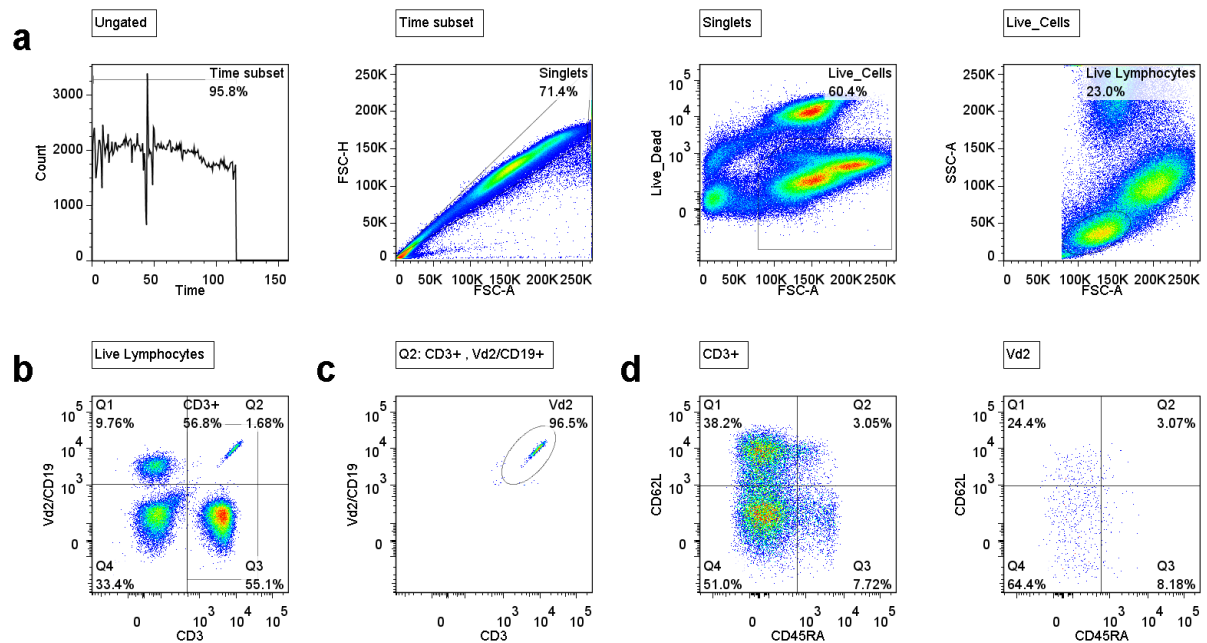

**Supplementary Figure 4: Gating strategy for Panel-4 – the V $\delta$ 2 T cell panel.** Cells for analysis of Panel-4 were gated as follows: (a) setting the time gate, exclusion of doublets, gating on live cells and furthermore on lymphocytes in FSC/SSC. (b) T cells were identified as CD3<sup>+</sup> cells. (c) V $\delta$ 2-antibody was used for identification of V $\delta$ 2 T cells in combination with CD3. (d) T cells were gated on CD45RA and CD62L to identify the position of the gate (left plot). The CD45RA versus CD62L gate was then transferred on V $\delta$ 2<sup>+</sup>CD3<sup>+</sup> cells for further phenotyping (right plot).
